# Supplementary material
Source: PubMed Central journal article supplement (PMC6741628)

## Supplementary Materials

### Signalling pathways mediating chemokine induction in keratinocytes by cathelicidin LL-37 and flagellin

Anastasia Nijnik<sup>1</sup>, Jelena Pistoljic<sup>1</sup>, Niall C.J. Filewod, and Robert E.W. Hancock

Centre for Microbial Disease and Immunity Research, Department of Microbiology and Immunology, University of British Columbia, Vancouver, BC, Canada.<sup>1</sup> Contributed equally to this paper

\* all data in this document has been generation during manuscript revision to address the reviewers' comments

---

**Supplementary Figure 1. Dose Titration of SFK Inhibitors.** CXCL8 chemokine production by human primary keratinocytes stimulated with LL-37 (3  $\mu\text{g}/\text{ml}$ ) and flagellin (0.5  $\mu\text{g}/\text{ml}$ ), in the presence of (A) SFK inhibitor PP2 10-1.25 $\mu\text{M}$  or DMSO vehicle control (added at the same level as in the wells receiving 10  $\mu\text{M}$  PP2); (B) negative control compound PP3. Bars show means  $\pm$  SEM. Statistical analysis by ANOVA with Bonferroni's Multiple Comparison post-hoc test, \* $p < 0.05$ , \*\*  $p < 0.01$ .

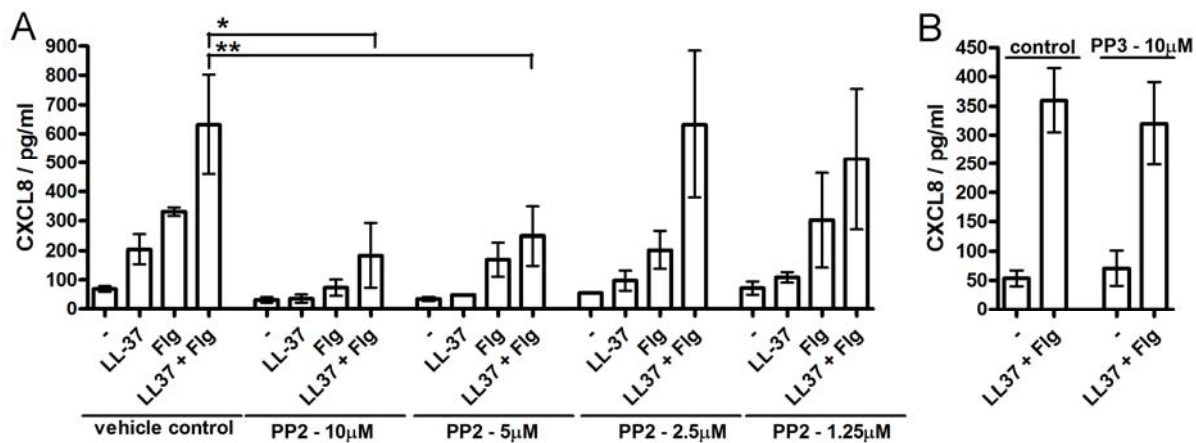

**Supplementary Figure 2. Total levels of Src in primary keratinocytes were unchanged over 30 min of LL-37 stimulation.** (A) Representative Western blots. (B) Blot intensities quantified using ImageJ software, and normalized against the intensity of GAPDH loading control; bars show means  $\pm$  SEM.

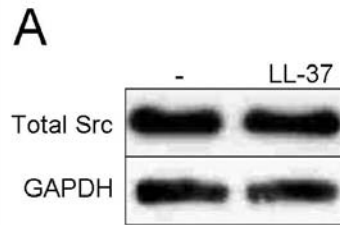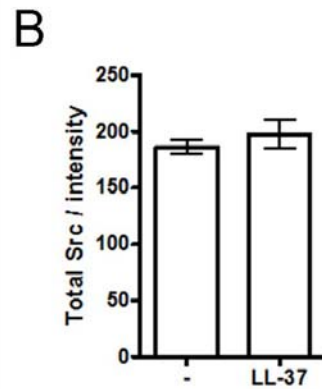

**Supplementary Figure 3. Mild reduction in CXCL8 production in response to LL-37 and flagellin stimulation in the Yes and Src knockdown keratinocytes (data from one experiment).** (A) The knockdown and mock-treated control cells were stimulated with LL-37 (5  $\mu\text{g/ml}$ ) and flagellin (0.5  $\mu\text{g/ml}$ ) for 24 hours, and CXCL8 production measured by ELISA. The data is from technical replicates within one experiment, analysis by ANOVA with Bonferroni's post-hoc test,  $p < 0.05$ . (B) Cell viability WST1 assay demonstrated no non-specific effects of the knockdown protocol on cell viability.

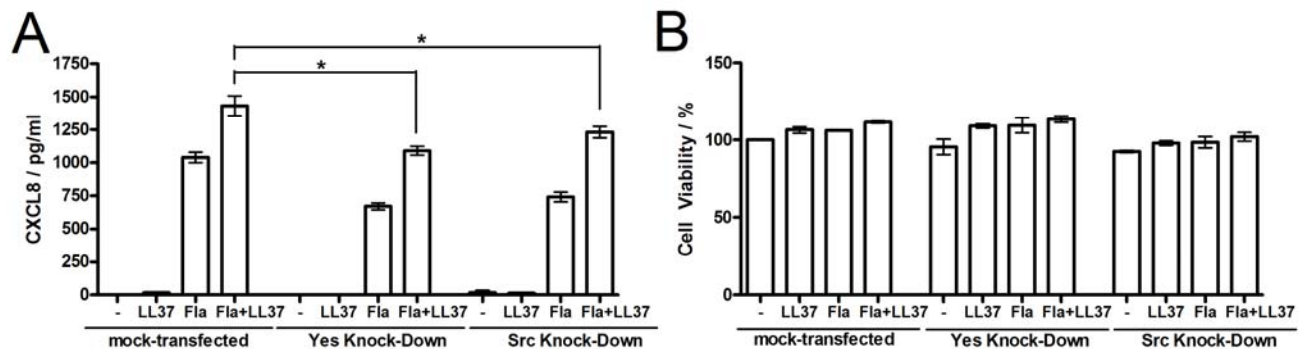

**Methods: siRNA Gene Silencing**

The cells were treated with the targeting Accell siRNAs at 1  $\mu\text{M}$  in Accell media (Dharmacon) for 96 hours. The cells were stimulated with LL-37 (5  $\mu\text{g/ml}$ ), flagellin (0.5  $\mu\text{g/ml}$ ) or the combination of the two stimuli for 24 hours. The siRNA treatments were checked for cytotoxicity using the WST-1 cell proliferation reagent (Roche). Knockdown efficiencies were confirmed by qRT-PCR, showing 76% reduction in *Yes* and 61% reduction in *Src* transcript levels in the knockdown cells. The knockdowns were also confirmed to be SFK specific, with no reduction in the *Src*-transcript levels in Yes-knockdown cells, and vice versa

**Supplementary Figure 4.** The effects of the LL-37, flagellin, and inhibitor treatment on the total levels of AKT and CREB proteins in keratinocytes. The cells were pretreated with SFK inhibitors PP2 or SU6656 (at 10 $\mu$ M) or an equivalent concentration of DMSO vehicle control for 1 hour, and stimulated with LL-37 (3  $\mu$ g/ml) or/and flagellin (0.5  $\mu$ g/ml) for 30 minutes. Cell-lysates were analyzed for the total levels of AKT and CREB. Blot intensities from 4 independent experiments were quantified using ImageJ 1.43u software, and standardized against the intensities of housekeeping loading control for each lane; bars show means  $\pm$  SEM.

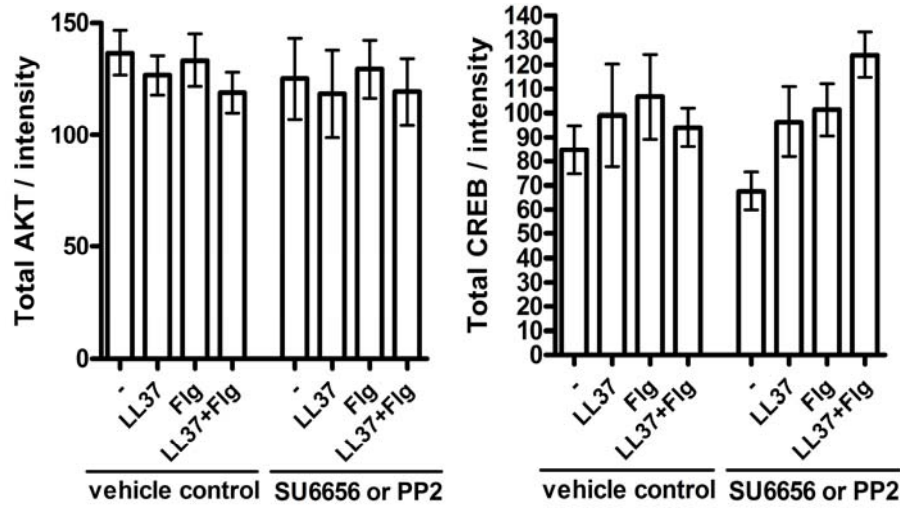

Supplement: jin-0004-0377-s01.pdf [file jin-0004-0377-s01.pdf]
